# Supplementary material for: A coumarin-based colorimetric and fluorescent dual probe for palladium(ii) ions that can be used in live cells
Source: Royal Society of Chemistry journal article supplement (doi:10.1039/c7nj00908a), 2017-01-01
Supplement: c7nj00908a1.pdf [file c7nj00908a1.pdf]

## Support information

| Sensor                                                                                    | Detection limit         | Responding time     | selectivity                                           | Remarks                                          |
|-------------------------------------------------------------------------------------------|-------------------------|---------------------|-------------------------------------------------------|--------------------------------------------------|
| <i>RSC Advances</i> , 2017, <b>7</b> , 20369-20372                                        | $7.8 \times 10^{-10}$ M | 80min               | very high selectivity                                 | CH <sub>3</sub> CN-PBS (1 : 1, v/v)              |
| <i>Analyst (Cambridge, United Kingdom)</i> , 2016, <b>141</b> , 2376-2379                 | $2.1 \times 10^{-9}$ M  | 30min               | very high selectivity                                 | PBS (10 mM, pH = 7.4)                            |
| <i>Analyst (Cambridge, United Kingdom)</i> , 2013, <b>138</b> , 1564-1569.                | no data                 | 20min               | interference of Au <sup>3+</sup> and Cu <sup>2+</sup> | CH <sub>3</sub> CN-H <sub>2</sub> O (1 : 1, v/v) |
| <i>RSC Advances</i> , 2016, <b>6</b> , 43539-43542                                        | $3.4 \times 10^{-7}$ M  | real-time detection | slight interference of Cu <sup>2+</sup>               | CH <sub>3</sub> CN-H <sub>2</sub> O (4 : 1, v/v) |
| <i>Analyst (Cambridge, United Kingdom)</i> , 2016, <b>141</b> , 832-835                   | $5.5 \times 10^{-8}$ M  | real-time detection | interference of Au <sup>3+</sup> and Cr <sup>3+</sup> | pure water                                       |
| <i>Analytical Chemistry (Washington, DC, United States)</i> , 2015, <b>87</b> , 4503-4507 | $2.3 \times 10^{-7}$ M  | real-time detection | very high selectivity                                 | EtOH-PBS (1 : 1, v/v)                            |
| This work                                                                                 | $4.0 \times 10^{-8}$ M  | real-time detection | very high selectivity                                 | EtOH-H <sub>2</sub> O (1 : 1, v/v)               |

Table 1 Comparison with recent reports in the literature. The first three are reactive palladium sensors and the latter four are coordination sensors.

(a)

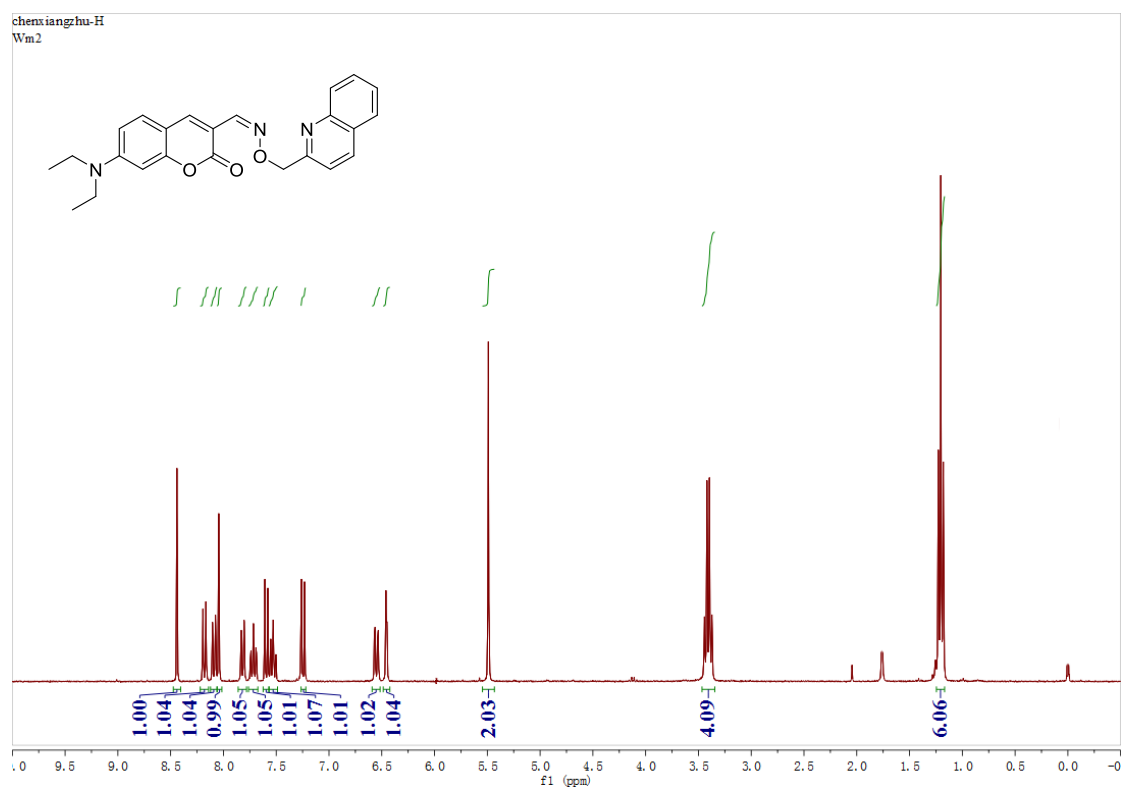

(b)

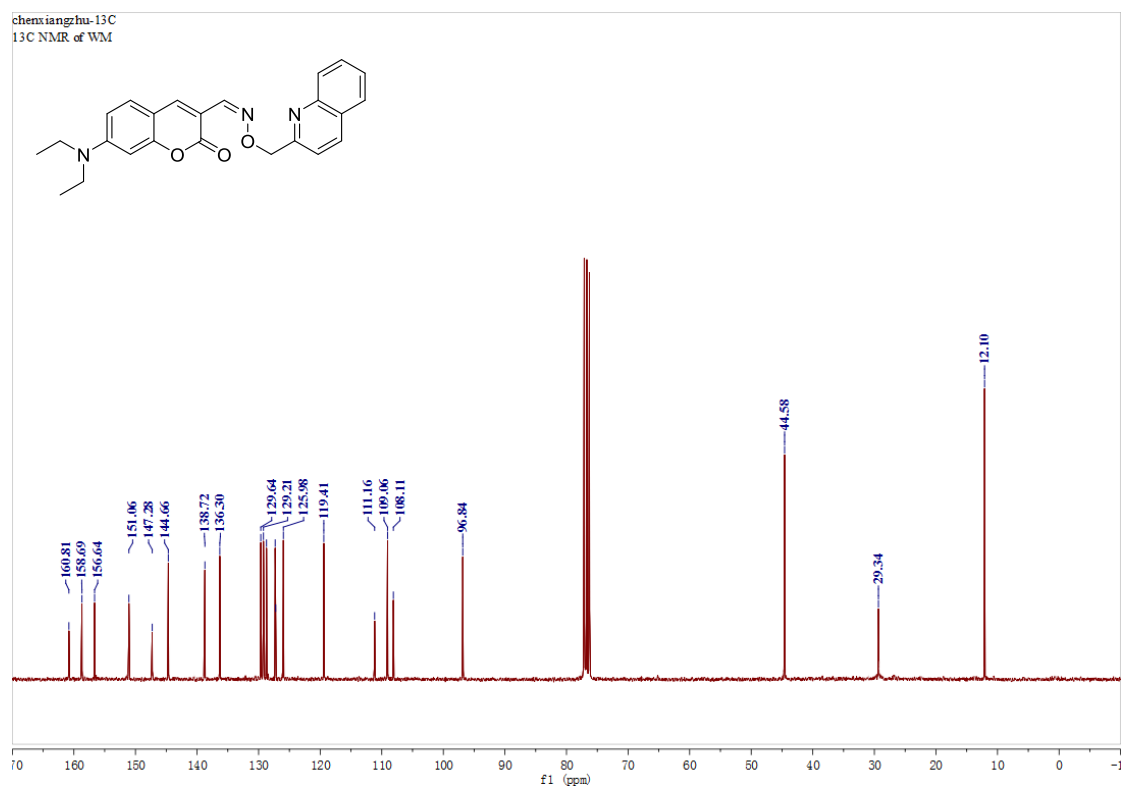

(c)

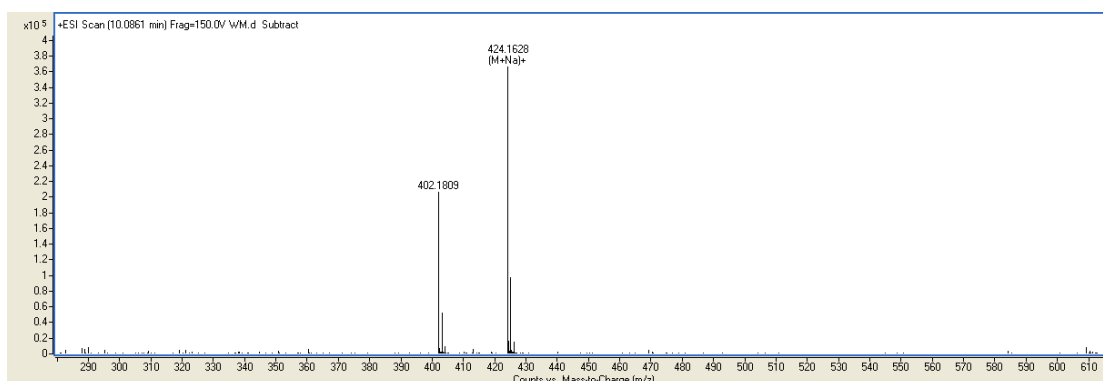

Fig. S1 <sup>1</sup>H NMR (a), <sup>13</sup>C NMR (b) and HRMS (c) spectra of **P**.

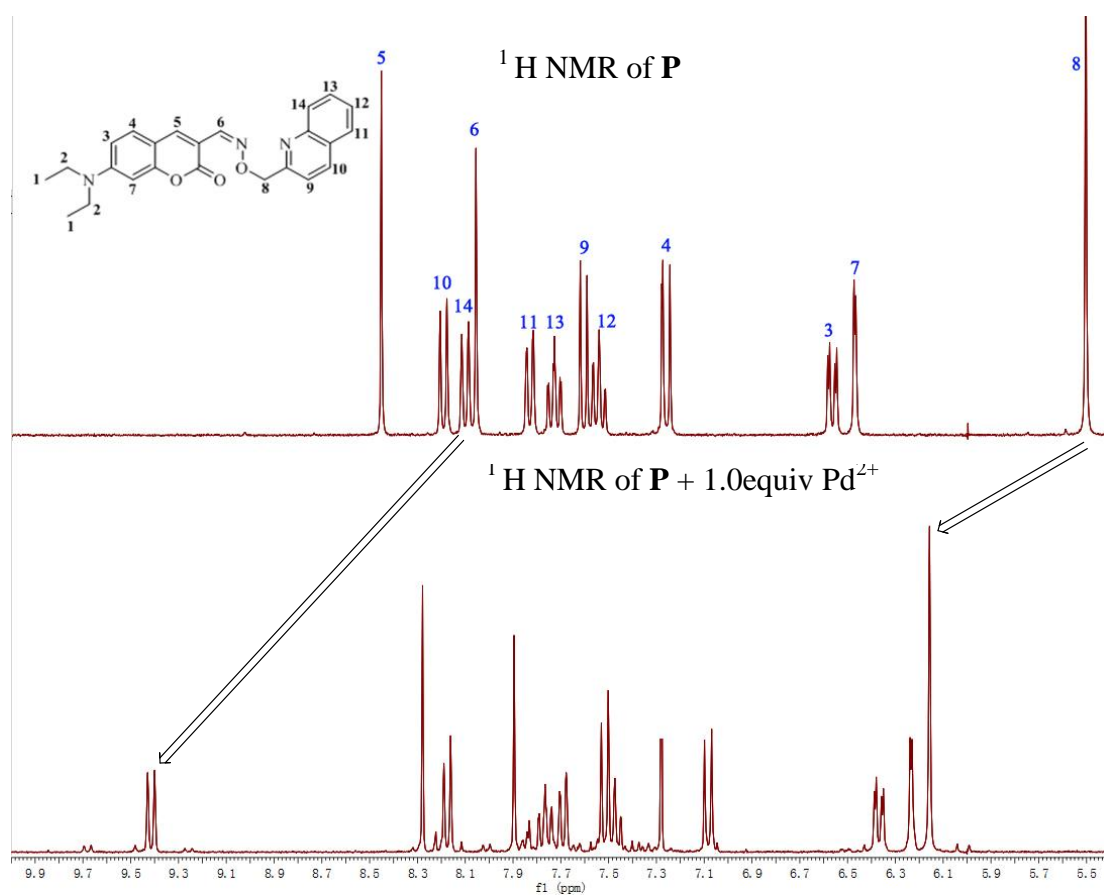

Fig. S2 The nuclear magnetic resonance experiment of **P** (in CDCl<sub>3</sub>) and 1.0 equiv Pd<sup>2+</sup> (in Dimethyl sulfoxide-d<sub>6</sub>)

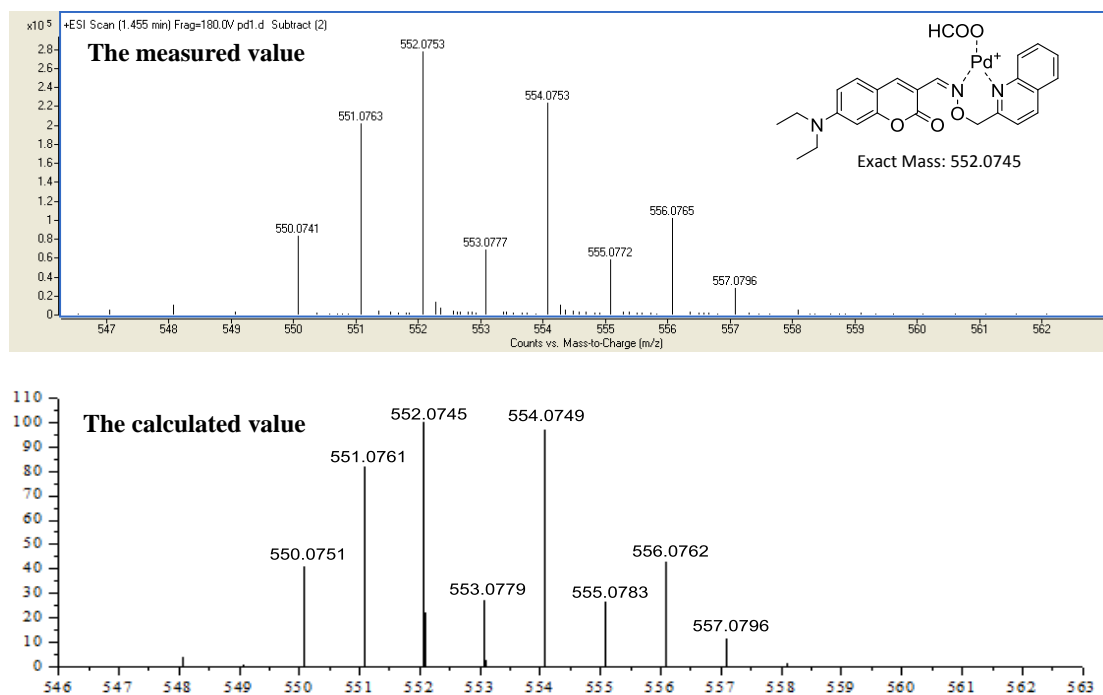

Fig. S3 HRMS spectra of **P** + Pd<sup>2+</sup>

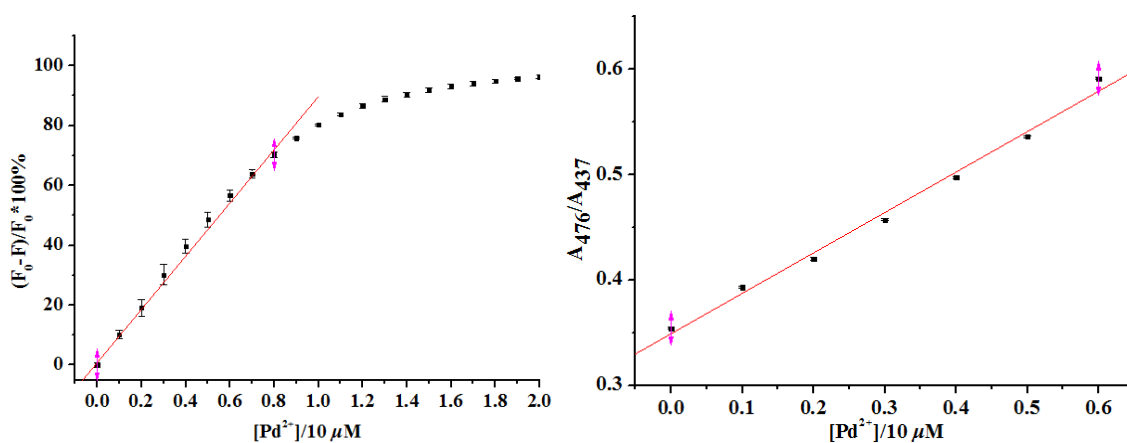

Fig. S4 (a) The percentage decline in fluorescence intensity at 500 nm of **P** (10.0 μM) as a function of the concentration of Pd<sup>2+</sup> in EtOH-H<sub>2</sub>O solution at 25°C.  $\lambda_{ex}$ =437 nm.  $F_0$ : the fluorescence intensity at 500 nm of **P** only.  $F$ : the fluorescence intensity at 500 nm of **P** in response to the presence of Pd<sup>2+</sup>. (b) Ratiometric curve of  $A_{476}/A_{437}$  as a function of the concentration of Pd<sup>2+</sup> in EtOH-H<sub>2</sub>O solution at 25°C.

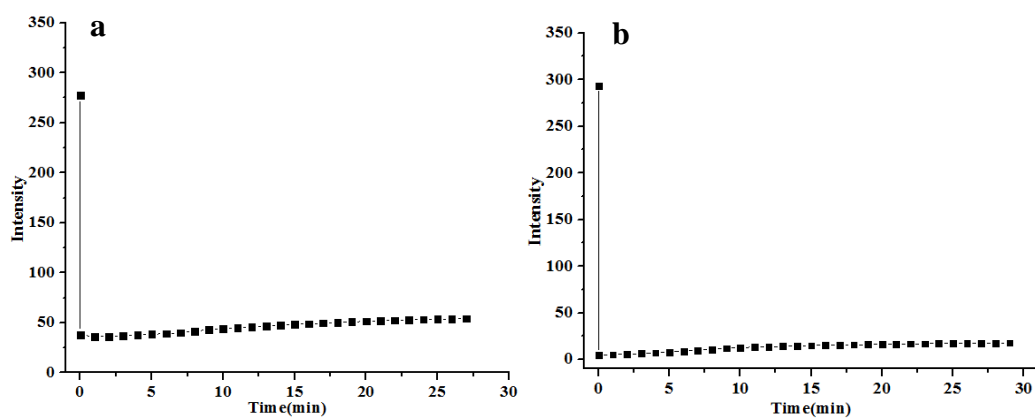

Fig. S5 Time-dependent changes of the fluorescence intensity at 500 nm upon addition of 1.0 (a) or 2.0 (b) equiv of  $\text{Pd}^{2+}$  in the solution of **P** (10.0  $\mu\text{M}$ ).  $\lambda_{\text{ex}}$ =437 nm.

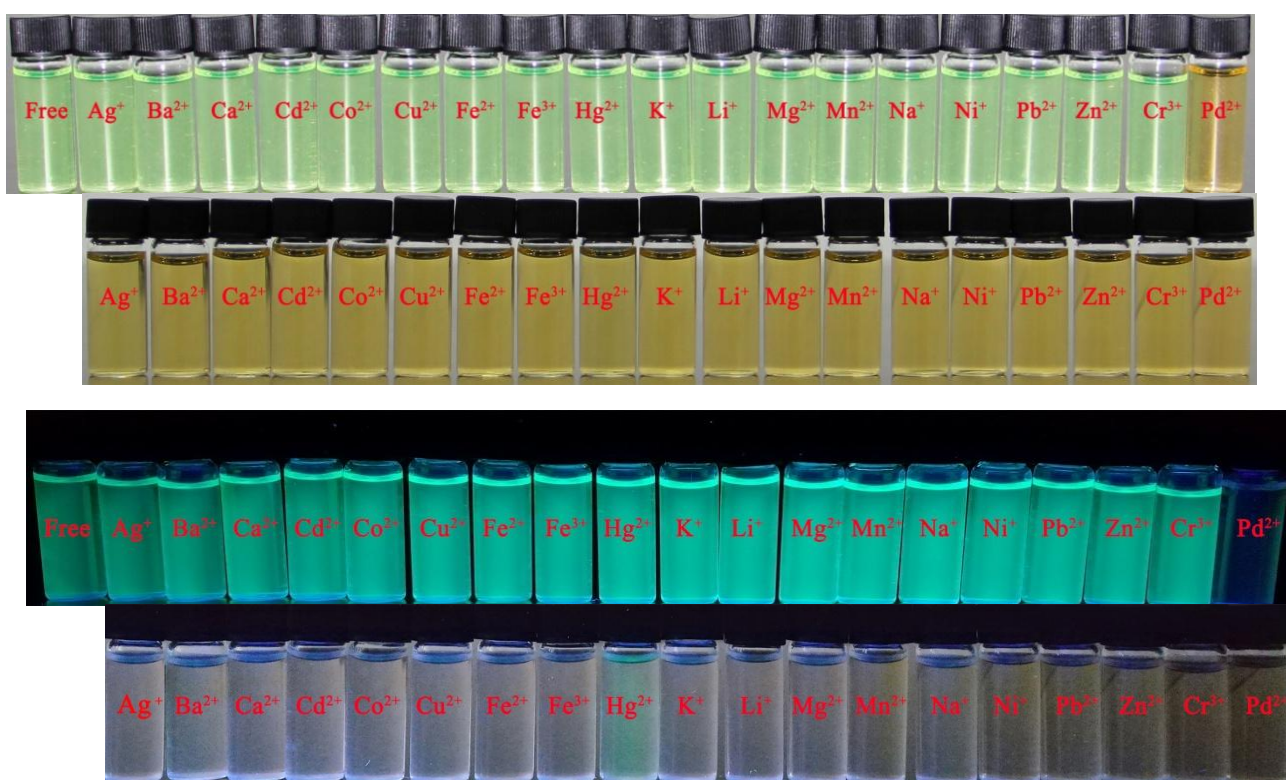

Fig. S6 (a) Color changes and (b) Fluorescence images of **P** (10.0  $\mu\text{M}$ ) in the presence of various metal ions and after further addition of 2.0 equiv of  $\text{Pd}^{2+}$ .  $\text{Li}^+$ ,  $\text{Mg}^{2+}$ ,  $\text{Mn}^{2+}$ ,  $\text{Na}^+$ ,  $\text{Pb}^{2+}$ ,  $\text{Zn}^{2+}$ ,  $\text{Ag}^+$ ,  $\text{Ba}^{2+}$ ,  $\text{Ca}^{2+}$ ,  $\text{Cd}^{2+}$ ,  $\text{Co}^{2+}$ ,  $\text{Fe}^{2+}$ ,  $\text{Fe}^{3+}$ ,  $\text{Hg}^{2+}$ ,  $\text{K}^+$ ,  $\text{Cu}^{2+}$ ,  $\text{Ni}^+$ ,  $\text{Cr}^{3+}$  were added by 5.0 equiv, separately.

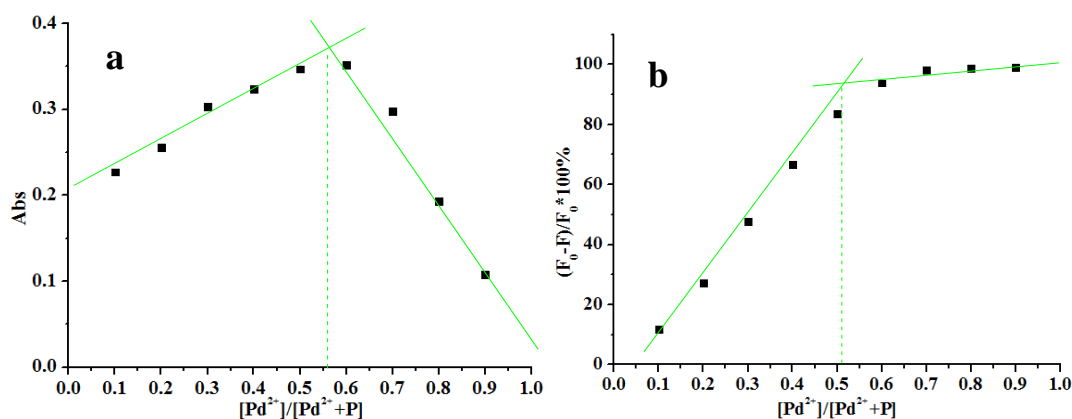

Fig. S7 (a) Job's plot of **P** with  $\text{Pd}^{2+}$  obtained by UV-Vis absorption spectroscopy ( $\lambda = 478 \text{ nm}$ ), the total concentration of **P** and  $\text{Pd}^{2+}$  is  $20 \mu\text{M}$ . (b) Job's plot of **P** with  $\text{Pd}^{2+}$  obtained by fluorescence emission spectrometry, the total concentration of **P** and  $\text{Pd}^{2+}$  is  $20 \mu\text{M}$ .  $F_0$ : the fluorescence intensity at 500 nm of **P** only.  $F$ : the fluorescence intensity at 500 nm of **P** in response to the presence of  $\text{Pd}^{2+}$ .

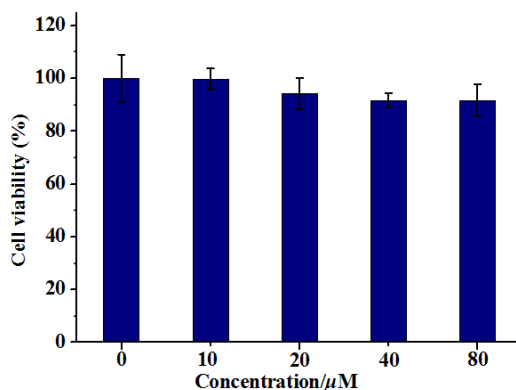

Fig. S8 Cytotoxicity assays of **P** at different concentrations (0  $\mu\text{M}$ , 10  $\mu\text{M}$ , 20  $\mu\text{M}$ , 40  $\mu\text{M}$ , 80  $\mu\text{M}$ ) for MARC-145 cells. The cell viabilities were estimated through standard MTT assay. The viability of cells without **P** is defined as 100%. The results are presented as mean  $\pm$  standard deviation ( $n = 6$ ).
